# Supplementary material
Source: publisher site journal article supplement (https://www.dovepress.com/article/supplementary_file/593063/593063%20Supplementary.docx)
Supplement: Supplementary file 1 [file 593063%20Supplementary.docx]

**Supplementary Methods**

**Data Processing and Determination of DEGs**The gene expression profile data were obtained from the GEO database. Three datasets comparing CAD patients and healthy controls were selected: GSE42148 (based on the Agilent-028004 SurePrint G3 Human GE 8x60K v2 platform, GPL13607), GSE98583 (based on the Affymetrix Human Genome U133A 2.0 Array, GPL571), and GSE12288 (based on the Affymetrix Human Genome U133A Array, GPL96). All datasets were standardized, probes that did not correspond to gene symbols were deleted, and the gene symbols corresponding to multiple probes were combined by taking the maximum value. The “limma” package in R software was used to screen the DEGs. A p-value < 0.05 and |logFC| > 1.0 were considered as cutoff criteria in GSE42148 and GSE98583. In GSE12288, p < 0.05 and |logFC| > 0.38 were used as cutoff standards. The “ggplot2” and “pheatmap” packages were used to generate volcano plots and heatmaps. A Venn diagram was constructed to visualize the intersection of the DEGs.

**GO Annotation and KEGG Pathway Enrichment Analysis**The DAVID website ([https://david.ncifcrf.gov/](https://www.google.com/url?sa=E&q=https%3A%2F%2Fdavid.ncifcrf.gov%2F)) was used to perform GO annotation (including Biological Process, Cellular Component, and Molecular Function) and KEGG pathway analysis on the screened DEGs. Results were visualized with the ggplot2 package.

**PPI Network Construction and Hub Gene Identification**The STRING database (v11.5) was used to construct a protein-protein interaction (PPI) network. The network was visualized using Cytoscape software (v3.8.2). The MCODE plug-in was used to identify significant modules, and the cytoHubba algorithm was used to identify hub genes based on network topology.

***In Silico* Validation of Hub Genes**The validation cohort GSE20681, based on the Agilent-014850 Whole Human Genome Microarray 4x44K G4112F platform (GPL4133), was normalized and used for validation. The receiver operating characteristic (ROC) curves were plotted, and the area under the curve (AUC) was determined using the “ROCR” package in R software to evaluate the diagnostic relevance of the hub genes.

**Immune Infiltration Analysis**The CIBERSORTx algorithm ([https://cibersortx.stanford.edu/](https://www.google.com/url?sa=E&q=https%3A%2F%2Fcibersortx.stanford.edu%2F)) was used to estimate the relative proportions of 22 types of immune cells from the standardized GSE12288 expression matrix. The number of permutations was set to 1000 for significance analysis.

**Detailed Exclusion Criteria for Clinical Validation**Exclusion criteria for all participants in the qPCR validation cohort were as follows: a history of myocardial infarction within the last 3 months, severe valvular heart disease, cardiomyopathy, severe liver or kidney dysfunction, autoimmune diseases, malignant tumors, or any acute or chronic inflammatory diseases.

**Supplementary Figures**

**
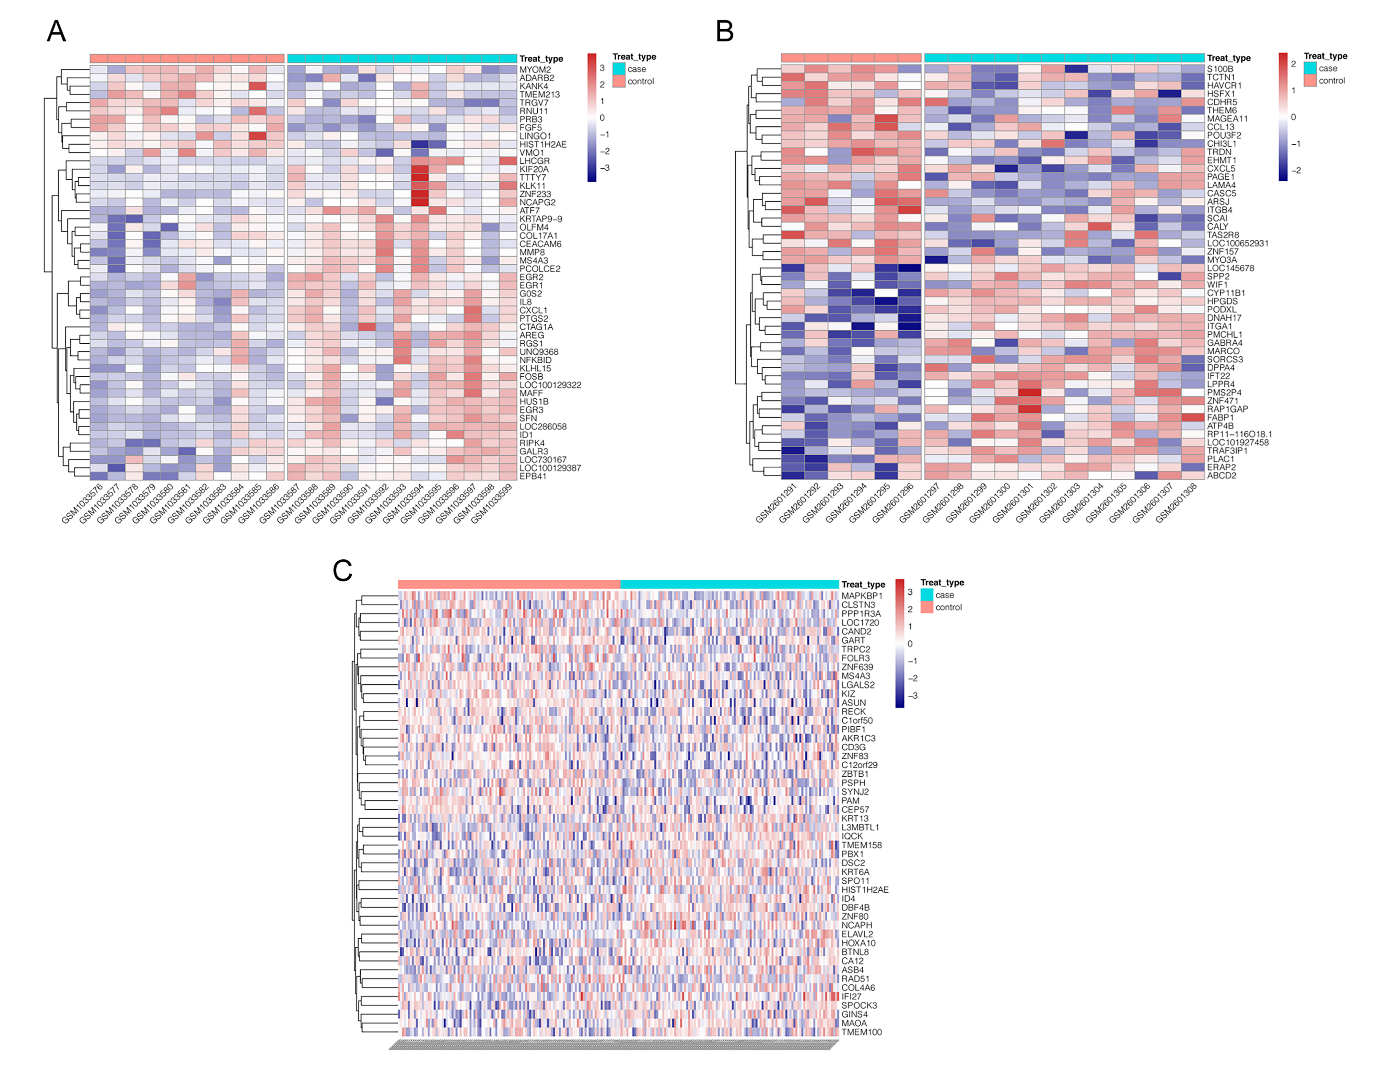
**

**Supplementary Figure 1. Heatmaps of the three sets of DEGs.** The expression profiles greater than the mean are shown in red, while those below the mean are in blue. **(A)** Heatmap of the top 50 DEGs in GSE42148. **(B)** Heatmap of the top 50 DEGs in GSE98583. **(C)** Heatmap of the top 50 DEGs in GSE12288.

**
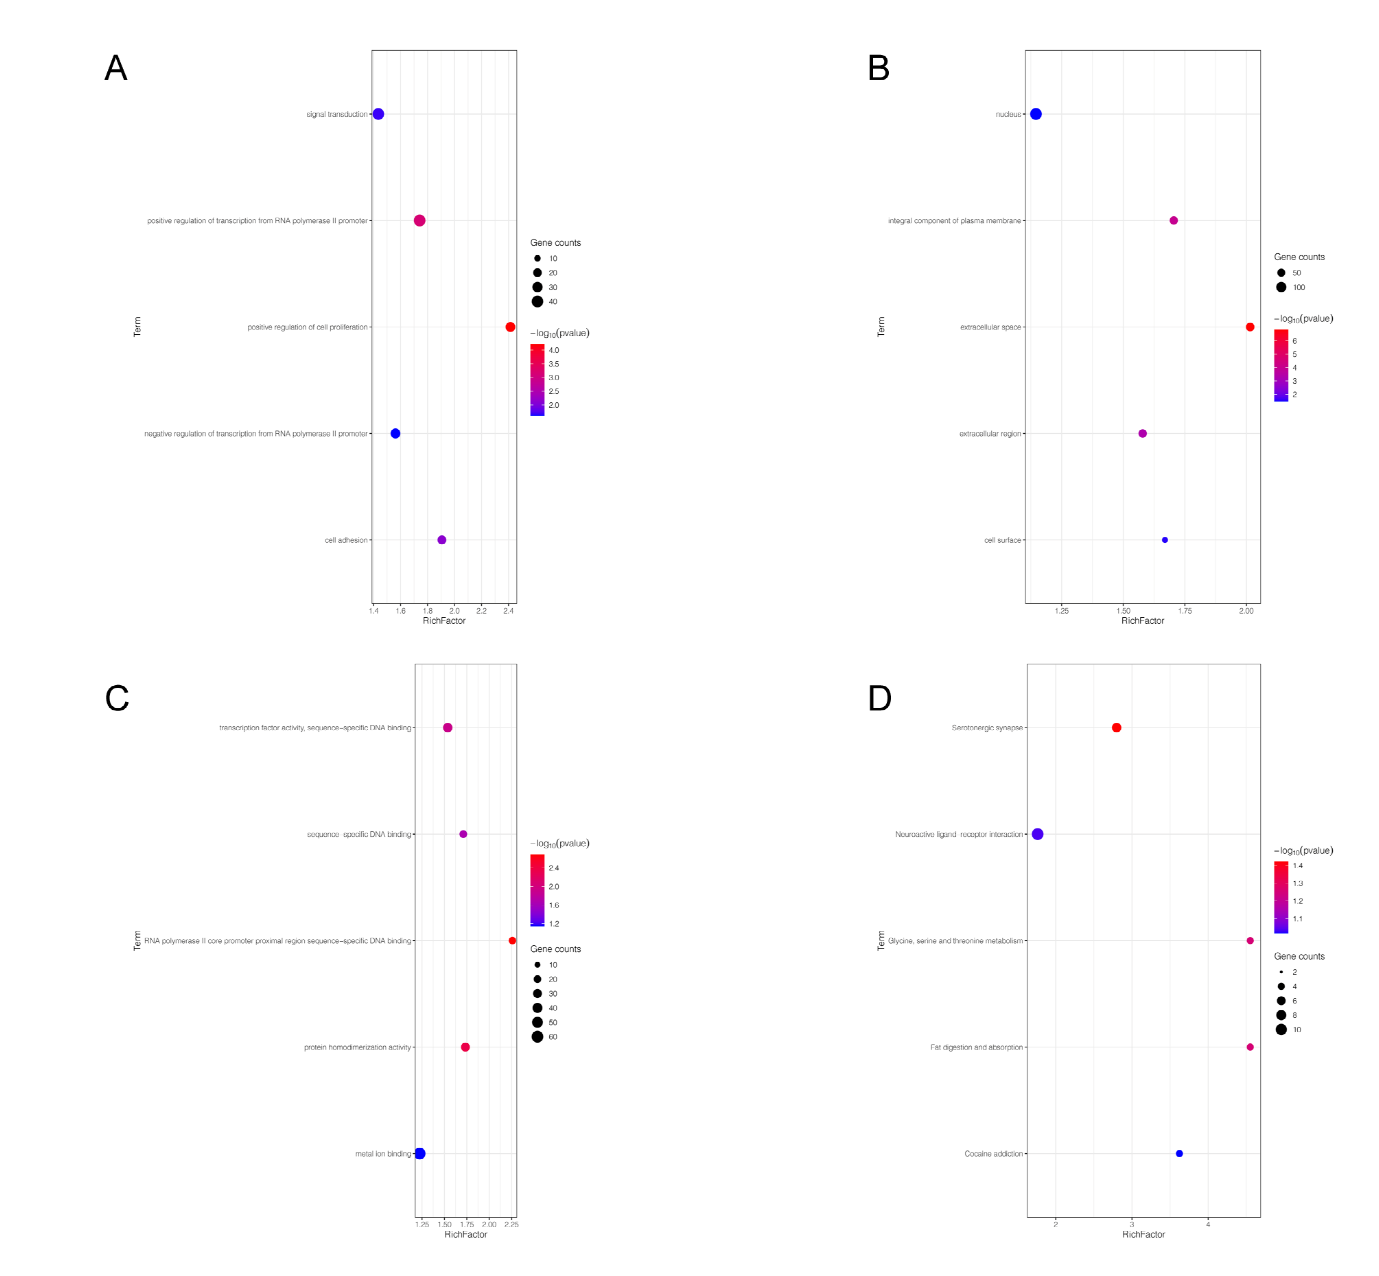
**

**Supplementary Figure 2. Top 5 enriched GO terms and top 5 enriched KEGG pathways of the DEGs. (A-C)** GO term enrichment analysis for (**A**) biological processes, (**B**) cellular components, and (**C**) molecular functions. **(D)** KEGG pathway enrichment analysis. Node size represents gene count; node color represents p-value. GO, gene ontology; KEGG, Kyoto Encyclopedia of Genes and Genomes.

**
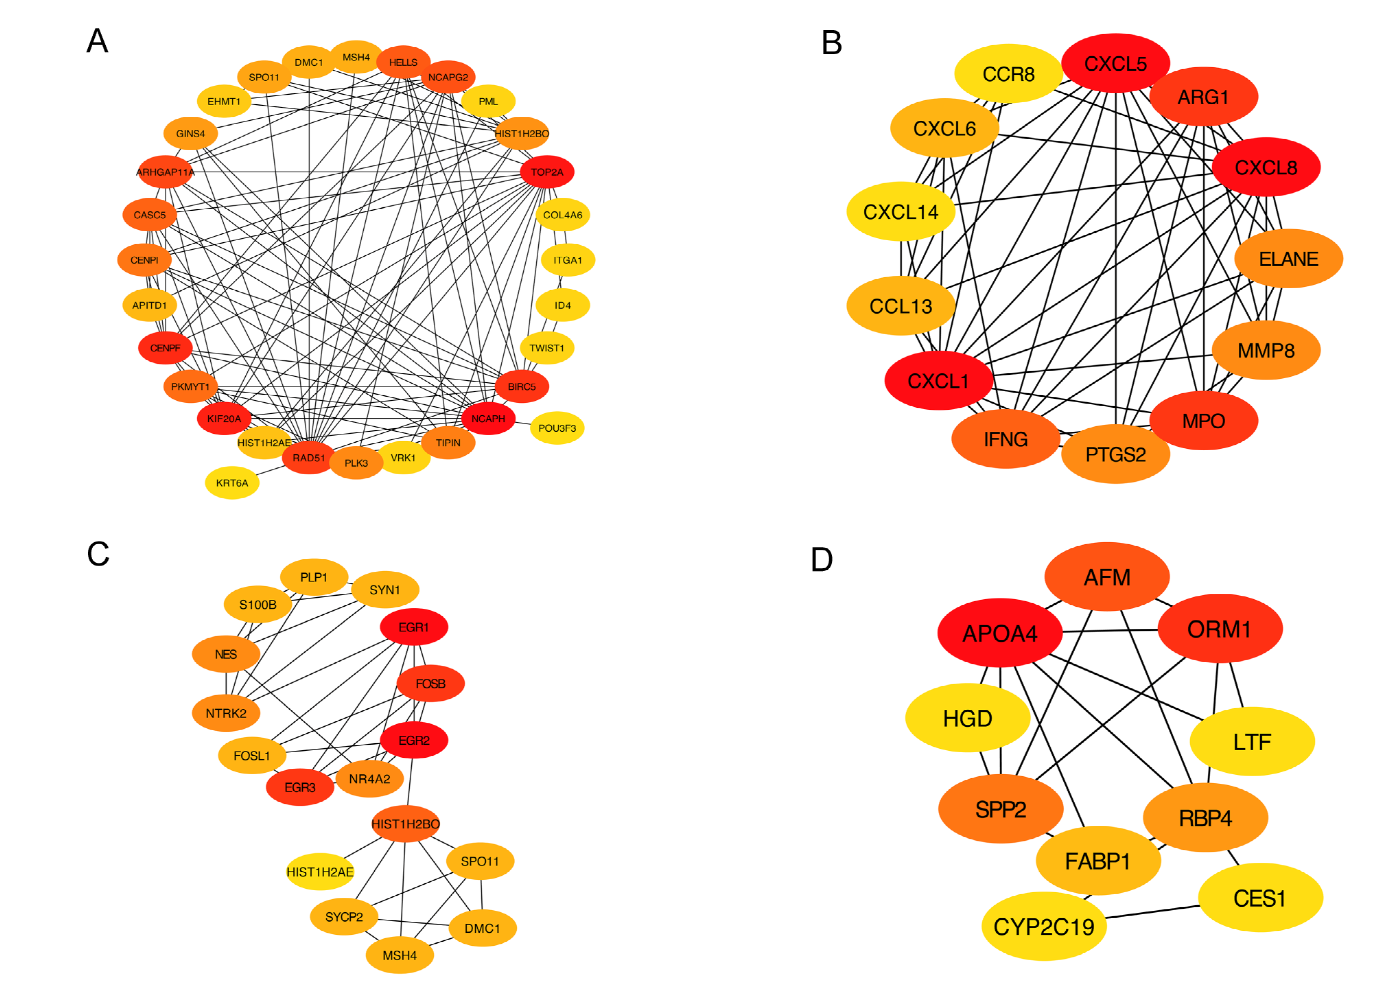
**

**Supplementary Figure 3. Construction of the PPI networks with four different scores.** The nodes represent proteins, and the edges represent their interactions. Color vividness represents the score. PPI networks with scores of 9.556 (**A**), 9.00 (**B**), 4.993 (**C**), and 4.50 (**D**), respectively.

**Supplemental Tables**

**Table S1. Details of the selected data set**

| **Dataset** | **Platform** | **Organism** | **Experiment type** | **Tissue** | **Samples (Case vs. Control)** | **Year** |
| --- | --- | --- | --- | --- | --- | --- |
| GSE42148 | GPL13607 | *Homo sapiens* | Expression profiling by array | Asian Indians | 13:11 | 2012 |
| GSE98583 | GPL571 | *Homo sapiens* | Expression profiling by array | North Indian | 12:6 | 2017 |
| GSE12288 | GPL96 | *Homo sapiens* | Expression profiling by array | Switzerland | 110:112 | 2008 |

**Table S2. Significantly enriched GO terms and KEGG pathways of the screened DEGs**

| **Category** | **Term** | **Description** | **Count** | **p-value** |
| --- | --- | --- | --- | --- |
| BP | GO:0045944 | positive regulation of transcription from RNA polymerase II promoter | 41 | 7.07E-04 |
| BP | GO:0007165 | signal transduction | 40 | 2.06E-02 |
| BP | GO:0008284 | positive regulation of cell proliferation | 27 | 6.05E-05 |
| BP | GO:0000122 | negative regulation of transcription from RNA polymerase II promoter | 27 | 2.47E-02 |
| BP | GO:0007155 | cell adhesion | 21 | 7.46E-03 |
| CC | GO:0005634 | nucleus | 144 | 3.37E-02 |
| CC | GO:0005615 | extracellular space | 63 | 1.46E-07 |
| CC | GO:0005576 | extracellular region | 59 | 4.83E-04 |
| CC | GO:0005887 | an integral component of the plasma membrane | 56 | 1.04E-04 |
| CC | GO:0009986 | cell surface | 21 | 2.79E-02 |
| MF | GO:0046872 | metal ion binding | 60 | 7.16E-02 |
| MF | GO:0003700 | transcription factor activity, sequence-specific DNA binding | 35 | 1.25E-02 |
| MF | GO:0042803 | protein homodimerization activity | 30 | 4.56E-03 |
| MF | GO:0043565 | sequence-specific DNA binding | 21 | 2.22E-02 |
| MF | GO:0000978 | RNA polymerase II core promoter proximal region sequence-specific DNA binding | 19 | 2.06E-03 |

**Table S3. Significantly enriched KEGG pathways of the screened DEGs**

| **Category** | **Term** | **Description** | **Count** | **p value** |
| --- | --- | --- | --- | --- |
| Pathway | hsa04080 | Neuroactive ligand-receptor interaction | 11 | 9.17E-02 |
| Pathway | hsa04726 | Serotonergic synapse | 7 | 3.78E-02 |
| Pathway | hsa00260 | Glycine, serine, and threonine metabolism | 4 | 5.59E-02 |
| Pathway | hsa04975 | Fat digestion and absorption | 4 | 5.59E-02 |
| Pathway | hsa05030 | Cocaine addiction | 4 | 9.62E-02 |
